# Supplementary material for: DFT Studies of Dimethylaminophenyl-Substituted Phthalocyanine and Its Silver Complexes
Source: MDPI journal article supplement (doi:10.3390/molecules29061344), 2024-03-18
Supplement: s1 [file s1]

# DFT studies of dimethylaminophenyl-substituted phthalocyanine and of its silver complexes

Martin Breza

Department of Physical Chemistry, Slovak Technical University, Radlinskeho 9, SK-81237 Bratislava, Slovakia

## Supplementary information

**Figure S1.** UV-vis spectra of neutral dmaphPcAg (full line) and dmaphPcH<sub>2</sub> (dashed line) in CHCl<sub>3</sub>.

**Figure S2.** Time dependence of absorption spectra during photolysis of [dmaphPcAg]<sup>0</sup> under LED@385 nm irradiation.

**Figure S3.** DFT optimized structure of <sup>2</sup>[dmaphPcH]<sup>0</sup> in CHCl<sub>3</sub>.

**Figure S4.** DFT optimized structure of <sup>2</sup>[dmaphPc]<sup>-</sup> in CHCl<sub>3</sub>.

**Figure S5.** DFT calculated spin density of <sup>4</sup>[dmaphPcAg]<sup>0</sup> in CHCl<sub>3</sub>.

**Figure S6.** DFT calculated spin density of <sup>3</sup>[dmaphPcAg]<sup>-</sup> in CHCl<sub>3</sub>.

**Figure S7.** DFT calculated spin density of <sup>4</sup>[dmaphPcAg]<sup>2-</sup> in CHCl<sub>3</sub>.

**Figure S8.** DFT calculated spin density of <sup>2</sup>[dmaphPcH]<sup>0</sup> in CHCl<sub>3</sub>

**Figure S9.** DFT calculated spin density of <sup>2</sup>[dmaphPc]<sup>-</sup> in CHCl<sub>3</sub>

**Figure S10.** TD-DFT calculated electron transitions in <sup>1</sup>[dmaphPcAg]<sup>+</sup> in CHCl<sub>3</sub>.

**Figure S11.** TD-DFT calculated electron transitions in <sup>3</sup>[dmaphPcAg]<sup>+</sup> in CHCl<sub>3</sub>.

**Figure S12.** TD-DFT calculated electron transitions in <sup>2</sup>[dmaphPcAg]<sup>0</sup> in CHCl<sub>3</sub>.

**Figure S13.** TD-DFT calculated electron transitions in <sup>4</sup>[dmaphPcAg]<sup>0</sup> in CHCl<sub>3</sub>.

**Figure S14.** TD-DFT calculated electron transitions in <sup>1</sup>[dmaphPcAg]<sup>-</sup> in CHCl<sub>3</sub>.

**Figure S15.** TD-DFT calculated electron transitions in <sup>3</sup>[dmaphPcAg]<sup>-</sup> in CHCl<sub>3</sub>.

**Figure S16.** TD-DFT calculated electron transitions in <sup>2</sup>[dmaphPcAg]<sup>2-</sup> in CHCl<sub>3</sub>.

**Figure S17.** TD-DFT calculated electron transitions in <sup>4</sup>[dmaphPcAg]<sup>2-</sup> in CHCl<sub>3</sub>.

**Figure S18.** TD-DFT calculated electron transitions in <sup>1</sup>[dmaphPcH<sub>2</sub>]<sup>0</sup> in CHCl<sub>3</sub>.

**Figure S19.** TD-DFT calculated electron transitions in <sup>1</sup>[dmaphPcH]<sup>-</sup> in CHCl<sub>3</sub>.

**Figure S20.** TD-DFT calculated electron transitions in <sup>2</sup>[dmaphPcH]<sup>0</sup> in CHCl<sub>3</sub>.

**Figure S21.** TD-DFT calculated electron transitions in <sup>1</sup>[dmaphPc]<sup>2-</sup> in CHCl<sub>3</sub>.

**Figure S22.** TD-DFT calculated electron transitions in <sup>2</sup>[dmaphPc]<sup>-</sup> in CHCl<sub>3</sub>.

## References

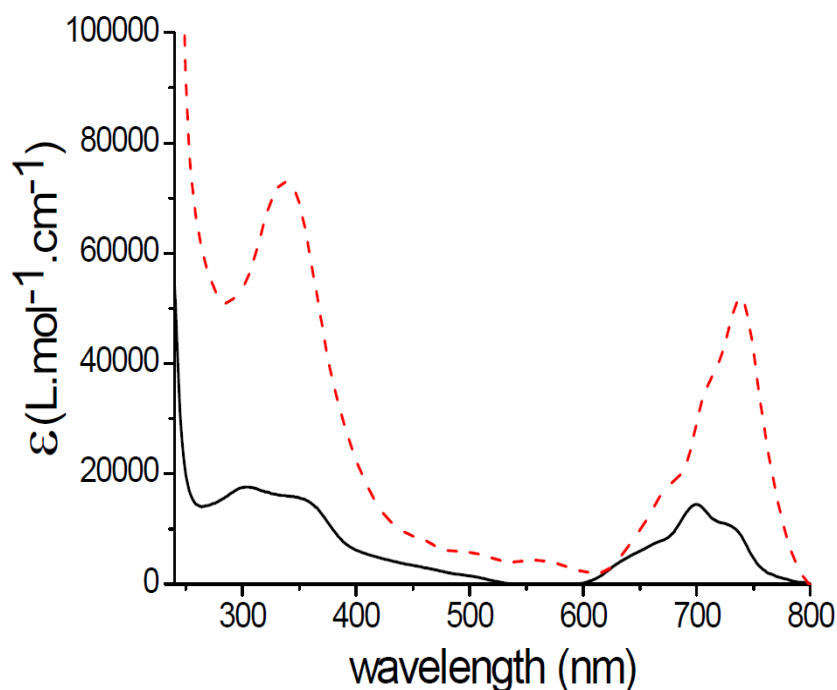

**Figure S1.** UV-vis spectra of neutral dmaphPcAg (full line) and dmaphPcH<sub>2</sub> (dashed line) in CHCl<sub>3</sub>. Reproduced from Ref. [1] with permission from the Royal Society of Chemistry.

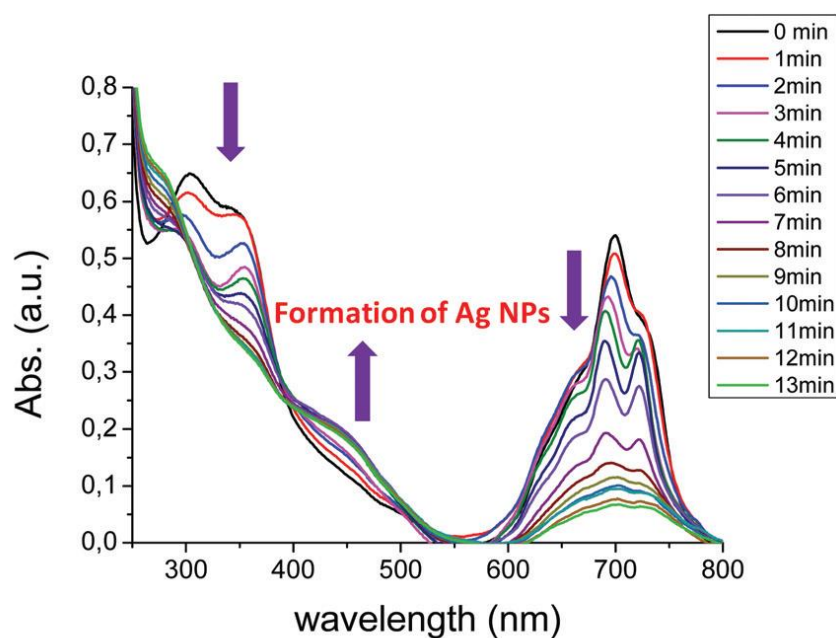

**Figure S2.** Time dependence of absorption spectra during photolysis of [dmaphPcAg]<sup>0</sup> under LED@385 nm irradiation. LED@385 nm intensity = 470 mW cm<sup>-2</sup>. Concentration of [dmaphPcAg]<sup>0</sup> = 3.8 × 10<sup>-5</sup> M. Solvent = CHCl<sub>3</sub>. Reproduced from Ref. [1] with permission from the Royal Society of Chemistry.

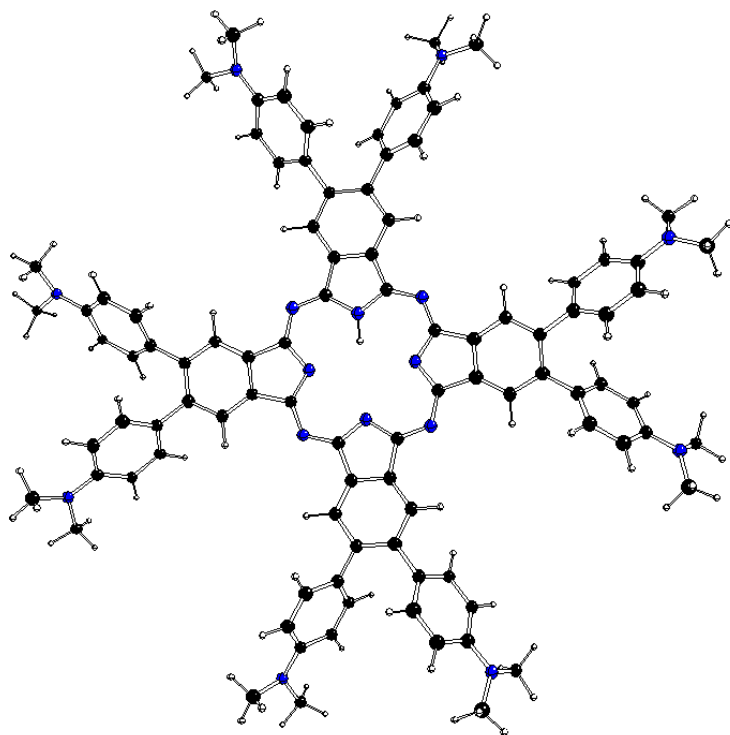

Figure S3. DFT optimized structure of  $^2[\text{dmaphPcH}]^0$  in  $\text{CHCl}_3$  (C – black, N – blue, H – white).

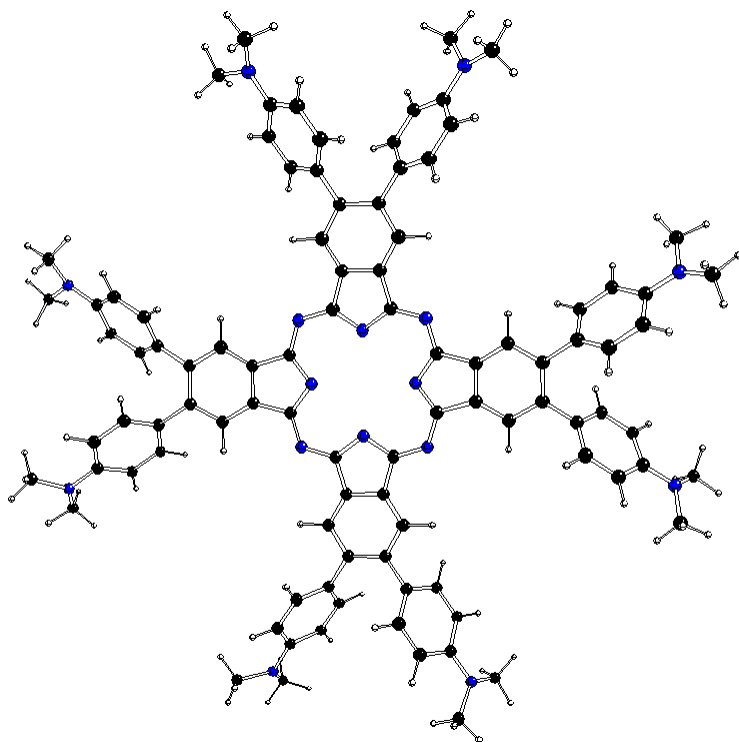

Figure S4. DFT optimized structure of  $^2[\text{dmaphPc}]^-$  in  $\text{CHCl}_3$  (C – black, N – blue, H – white).

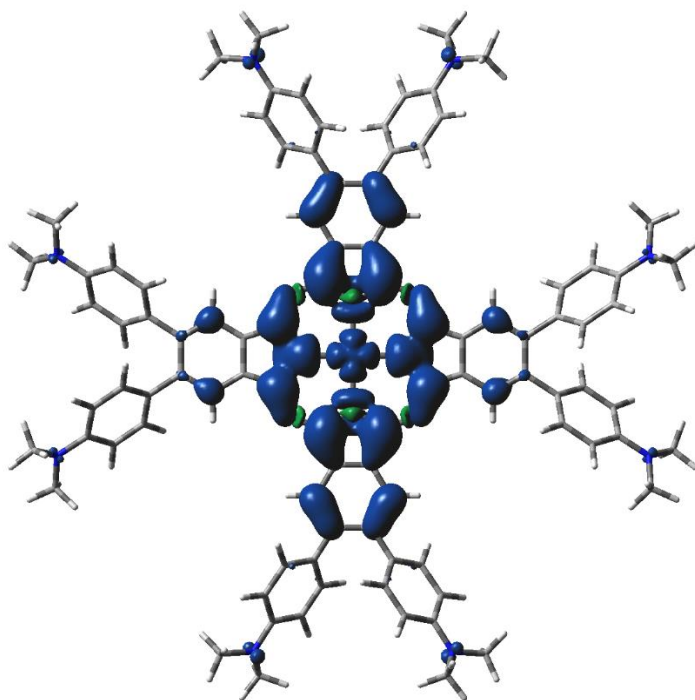

Figure S5. DFT calculated spin density of  $^4[\text{dmaphPcAg}]^0$  in  $\text{CHCl}_3$  (0.001 a.u. isosurface).

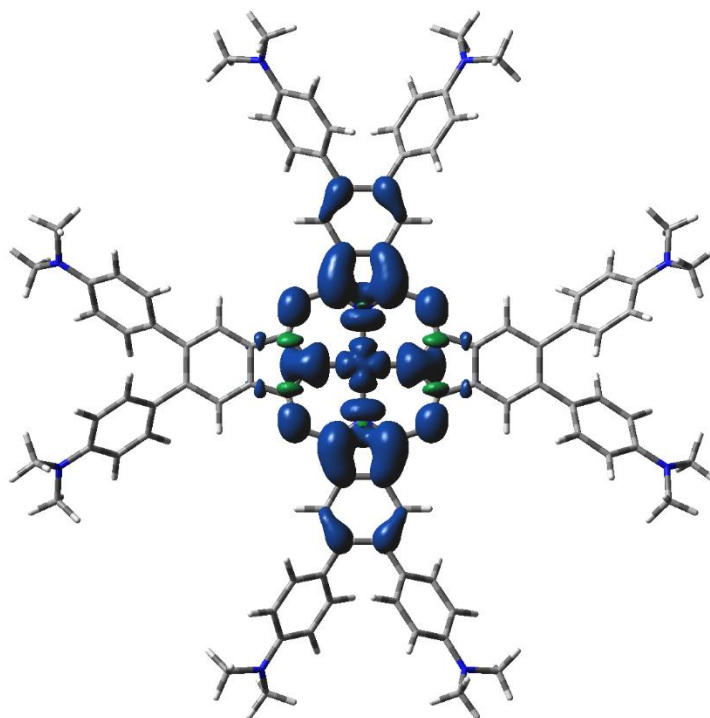

Figure S6. DFT calculated spin density of  $^3[\text{dmaphPcAg}]^-$  in  $\text{CHCl}_3$  (0.001 a.u. isosurface).

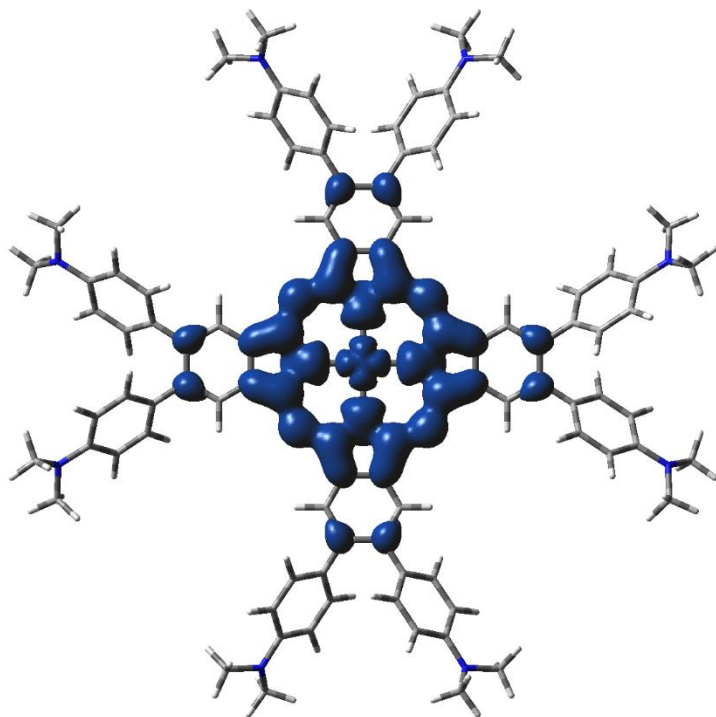

Figure S7. DFT calculated spin density of  $^4[\text{dmaphPcAg}]^{2-}$  in  $\text{CHCl}_3$  (0.001 a.u. isosurface).

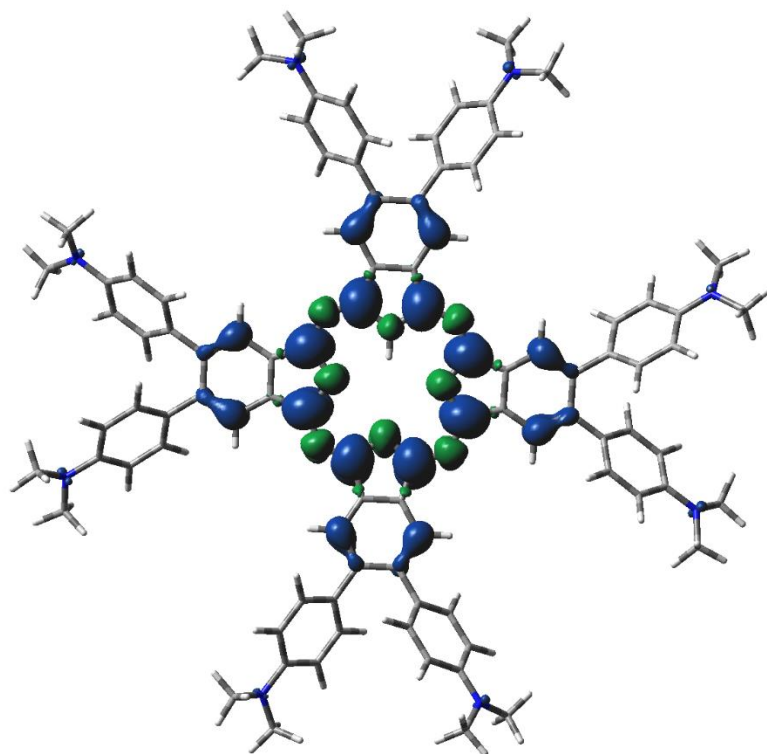

Figure S8. DFT calculated spin density of  $^2[\text{dmaphPcH}]^0$  in  $\text{CHCl}_3$  (0.001 a.u. isosurface).

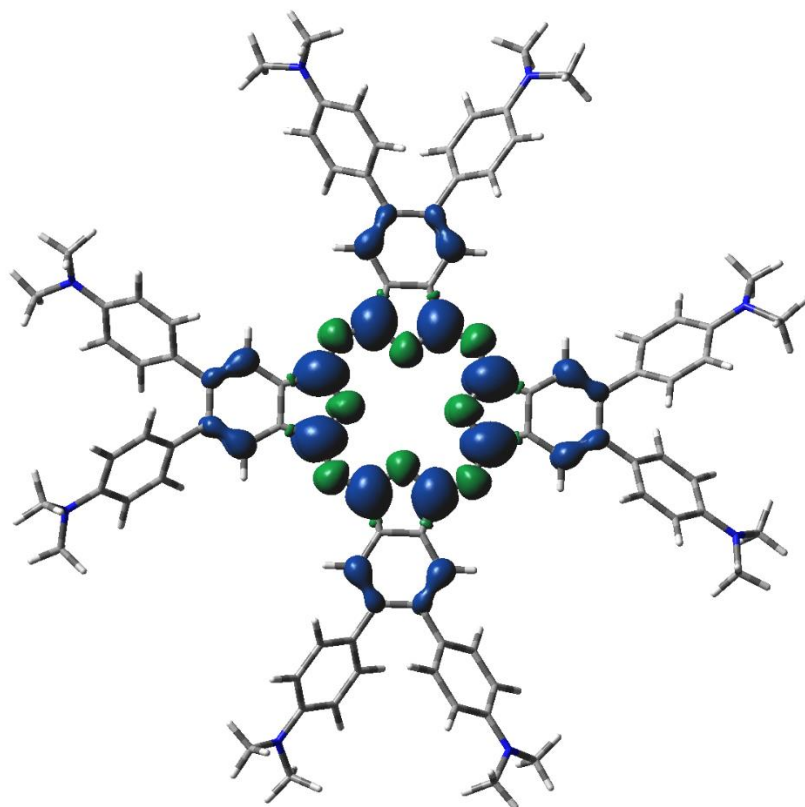

Figure S9. DFT calculated spin density of  $^2[\text{dmaphPc}]^-$  in  $\text{CHCl}_3$  (0.001 a.u. isosurface).

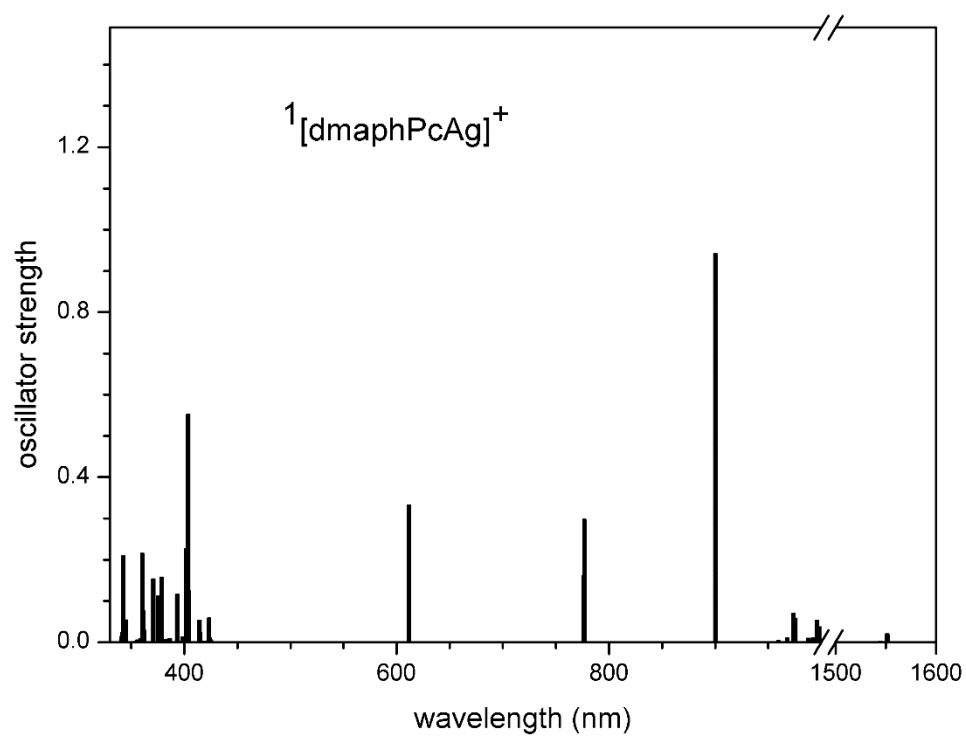

Figure S10. TD-DFT calculated electron transitions in  $^1[\text{dmaphPcAg}]^+$  in  $\text{CHCl}_3$ .

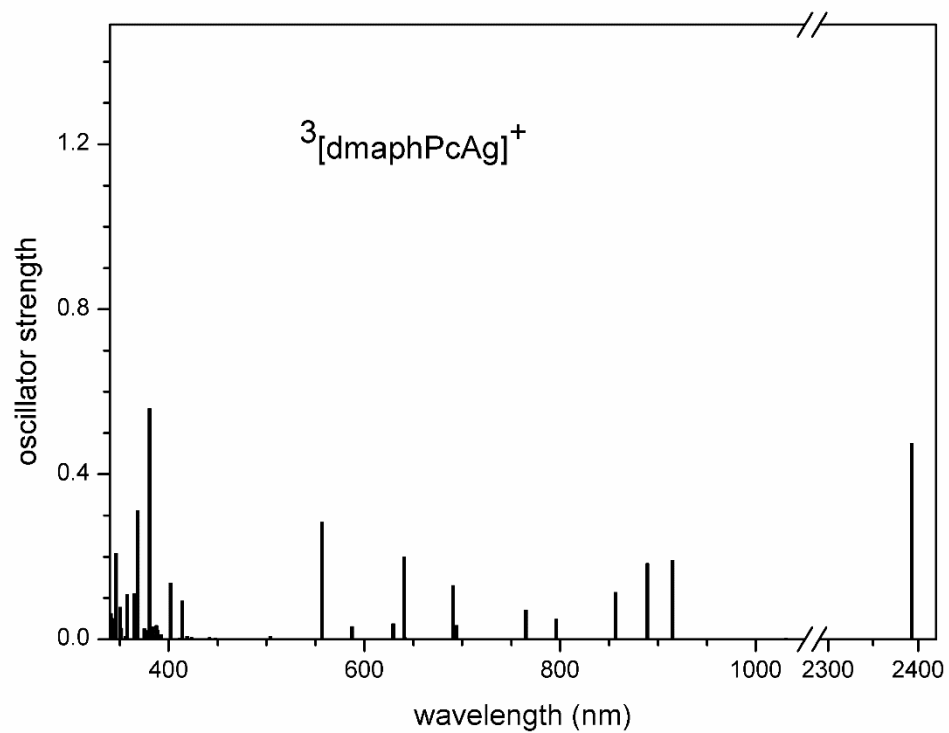

Figure S11. TD-DFT calculated electron transitions in  $^3[\text{dmaphPcAg}]^+$  in  $\text{CHCl}_3$ .

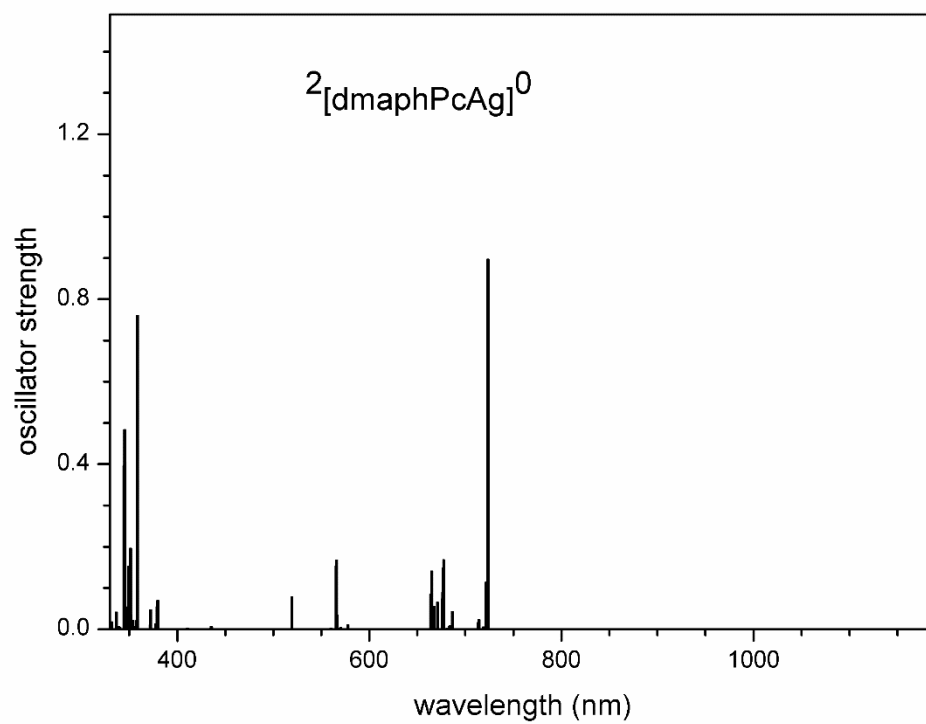

Figure S12. TD-DFT calculated electron transitions in  $^2[\text{dmaphPcAg}]^0$  in  $\text{CHCl}_3$ .

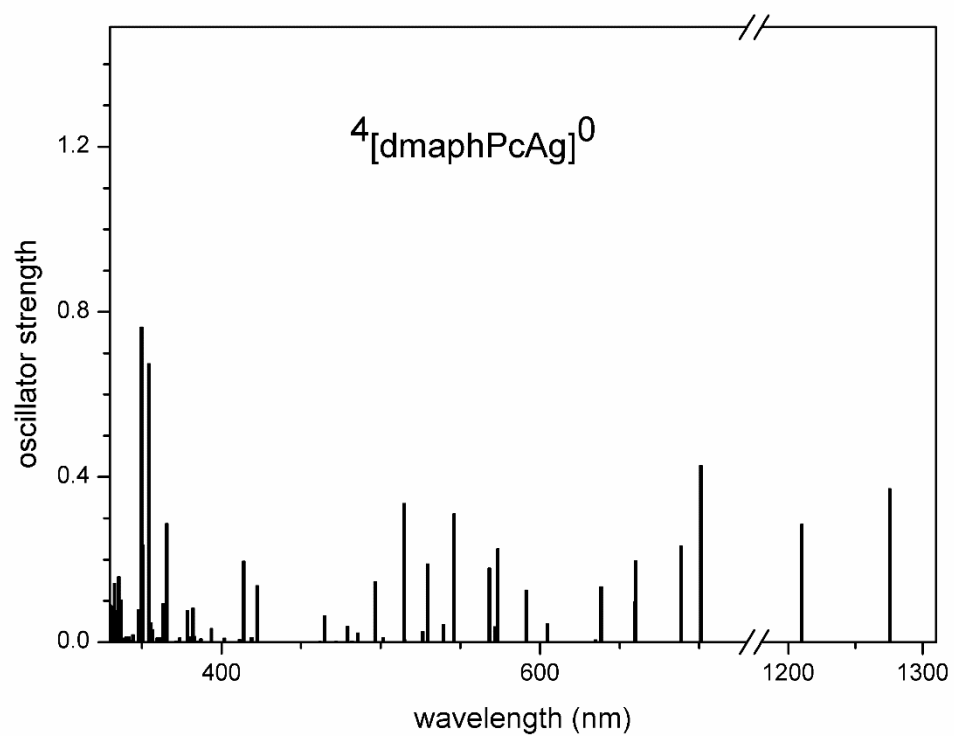

Figure S13. TD-DFT calculated electron transitions in <sup>4</sup>[dmaphPcAg]<sup>0</sup> in CHCl<sub>3</sub>.

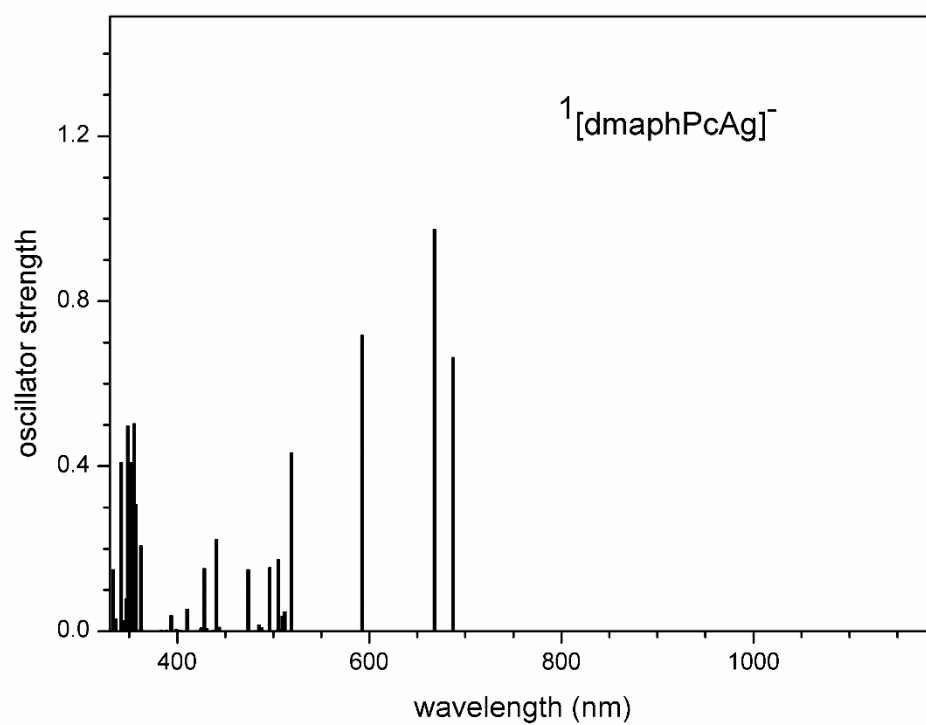

Figure S14. TD-DFT calculated electron transitions in <sup>1</sup>[dmaphPcAg]<sup>-</sup> in CHCl<sub>3</sub>.



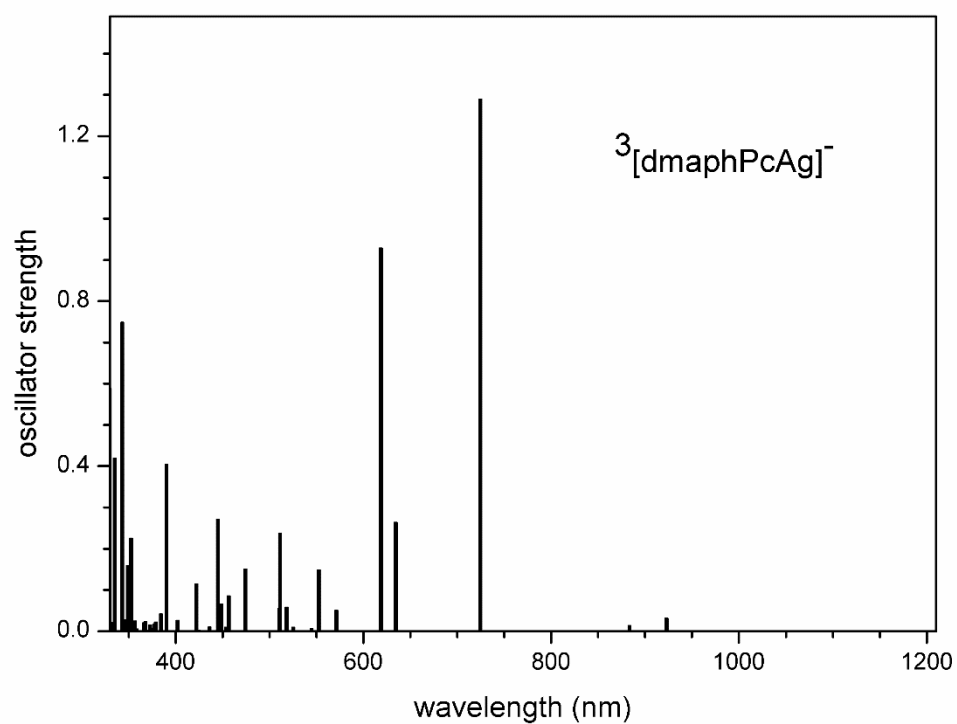

Figure S15. TD-DFT calculated electron transitions in  $^3[\text{dmaphPcAg}]^-$  in  $\text{CHCl}_3$ .

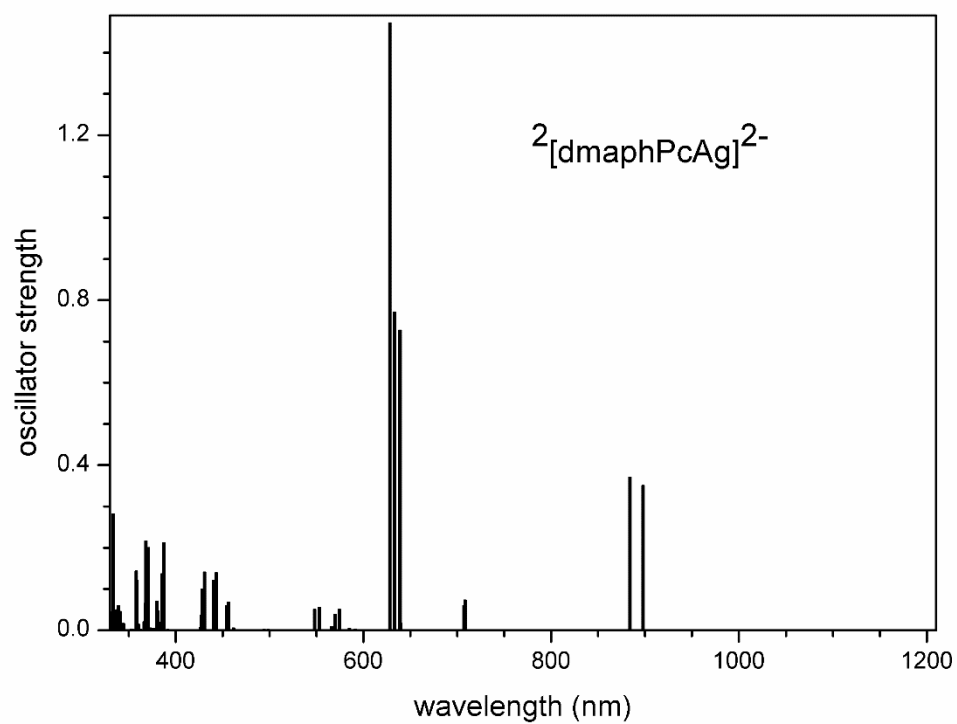

Figure S16. TD-DFT calculated electron transitions in  $^2[\text{dmaphPcAg}]^{2-}$  in  $\text{CHCl}_3$ .

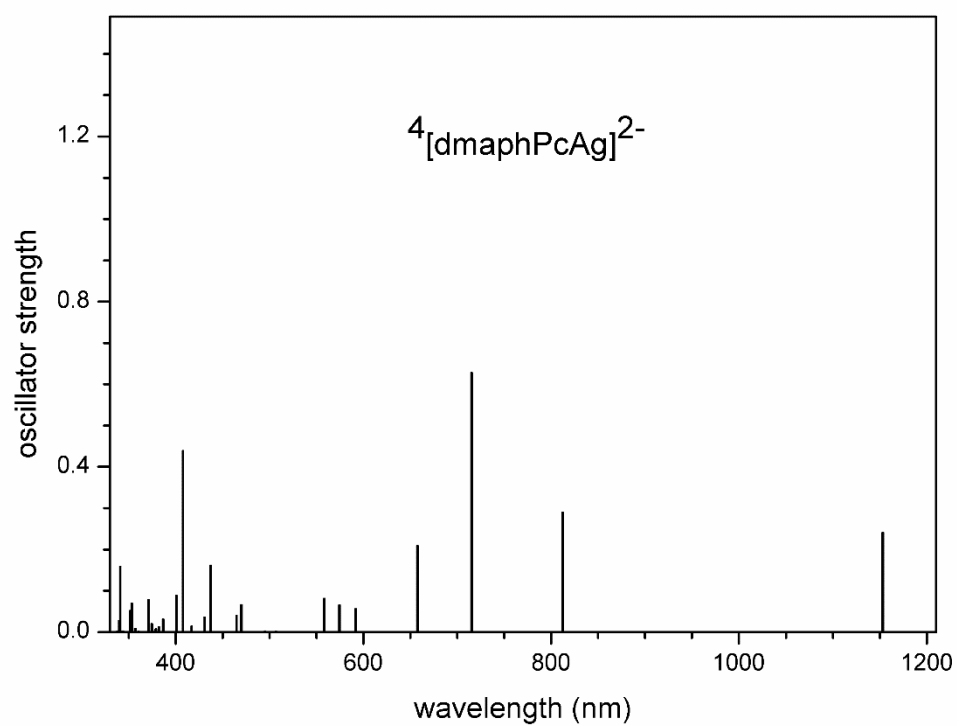

Figure S17. TD-DFT calculated electron transitions in  $4[\text{dmaphPcAg}]^{2-}$  in  $\text{CHCl}_3$ .

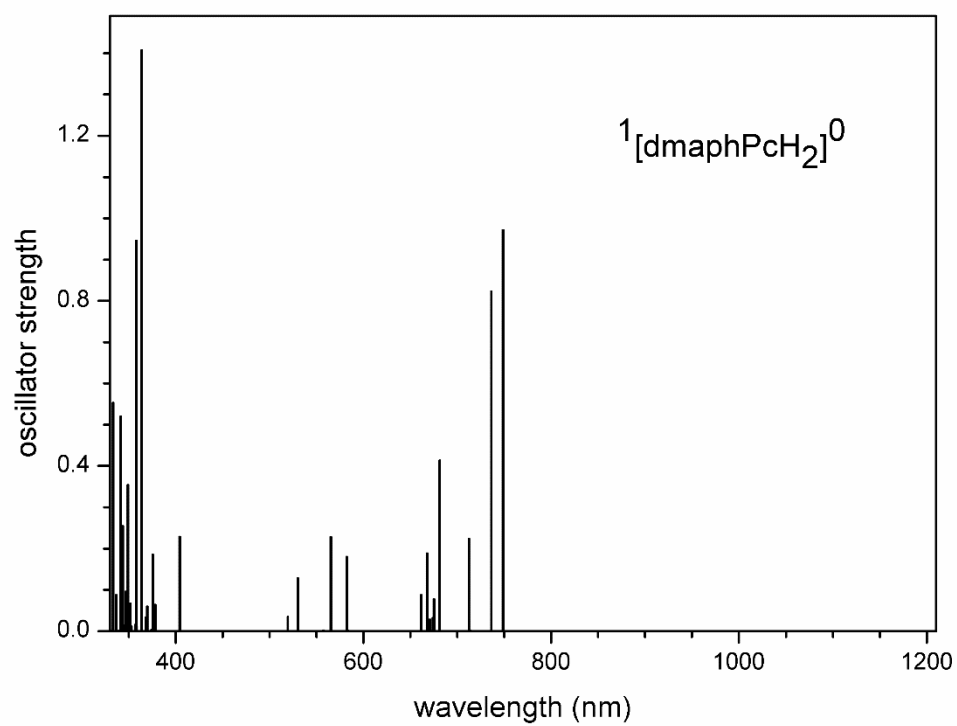

Figure S18. TD-DFT calculated electron transitions in  $1[\text{dmaphPcH}_2]^0$  in  $\text{CHCl}_3$ .

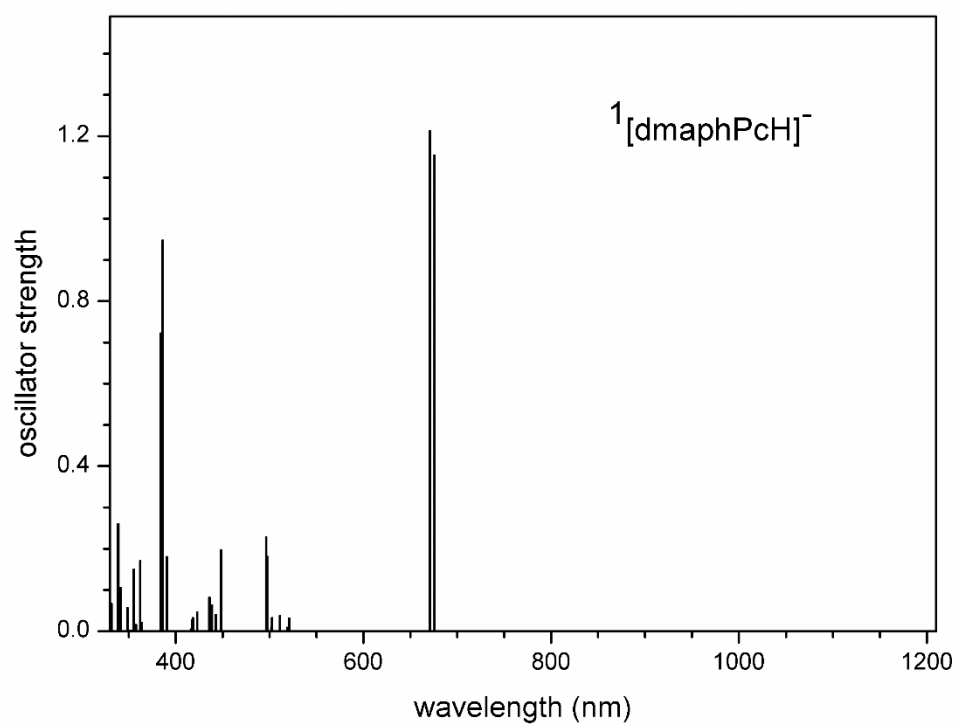

Figure S19. TD-DFT calculated electron transitions in  $1[\text{dmaphPcH}]^-$  in  $\text{CHCl}_3$ .

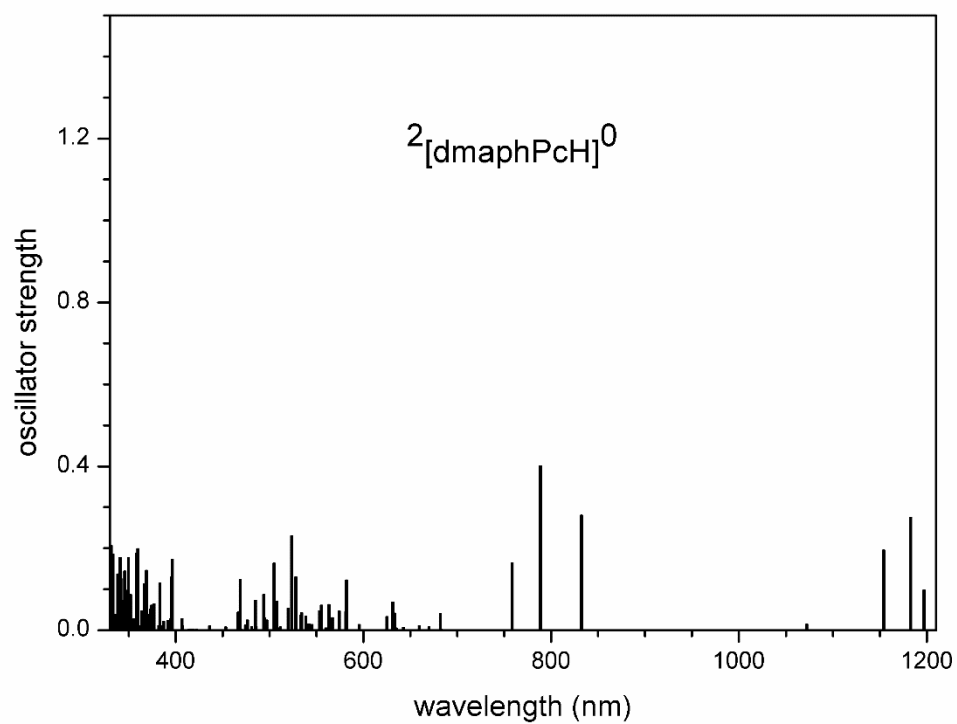

Figure S20. TD-DFT calculated electron transitions in  $2[\text{dmaphPcH}]^0$  in  $\text{CHCl}_3$ .

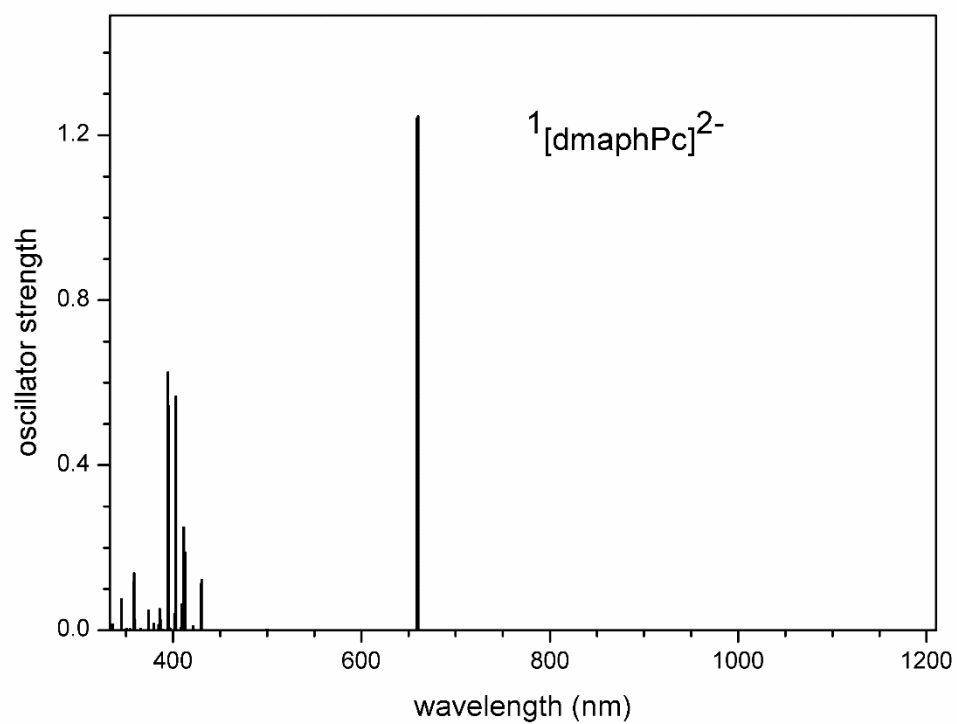

Figure S21. TD-DFT calculated electron transitions in  $^1[\text{dmaphPc}]^{2-}$  in  $\text{CHCl}_3$ .

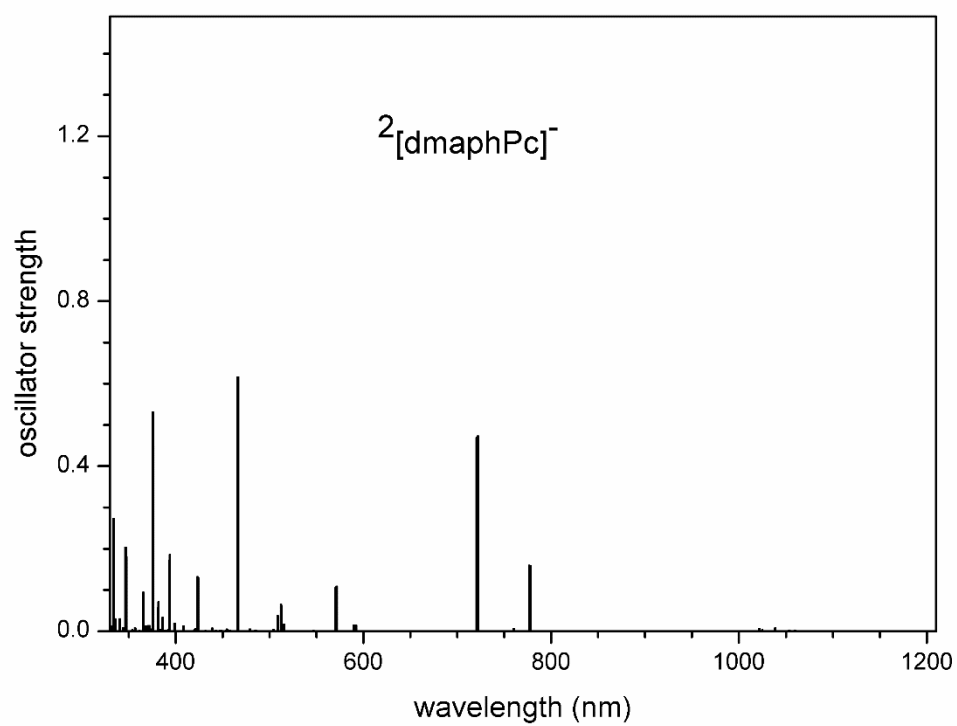

Figure S22. TD-DFT calculated electron transitions in  $^2[\text{dmaphPc}]^-$  in  $\text{CHCl}_3$ .

## References

1. Breloy, L.; Alcay, Y.; Yilmaz, I.; Breza, M., Bourgon, J.; Brezová, V.; Yagci, Y., Versace, D.-L. Dimethyl amino phenyl substituted silver phthalocyanine as a UV- and visible-light absorbing photoinitiator: in situ preparation of silver/polymer nanocomposites. *Polym. Chem.* **2021**, 12, 1273-1285.
